# Supplementary material
Source: publisher site journal article supplement (https://www.dovepress.com/get_supplementary_file.php?f=420603.docx)
Supplement: Supplementary file 1 [file get_supplementary_file.php]

**Supplemental Methods**

***Study variables***

We examined demographic characteristics, including age, sex, race and ethnicity, and clinical characteristics such as cirrhosis, Charlson Comorbidity Index (CCI), advance care directives, hospice/palliative care, HCC treatment, and follow-up time. The HBV treatment rate was defined by receipt of at least one prescription for lamivudine, adefovir, telbivudine, emtricitabine, entecavir, tenofovir disoproxil fumarate, or tenofovir alafenamide. The HCV treatment rate consists of at least one prescription for antiviral (DAA) medications for HCV and was analysed only for patients with HCC index date in 2014 or after, since DAAs did not become available until 2014. We reported results for the following laboratory tests: platelets, international normalized ratio (INR), creatinine, alanine aminotransferase (ALT), aspartate aminotransferase (AST), total bilirubin, alkaline phosphate (ALP), albumin, alpha-fetoprotein and albumin-bilirubin (ALBI) score.

**Supplemental Table 1:** ICD codes

| Diagnosis | ICD codes |
| --- | --- |
| HCV | 070.41, 070.44, 070.51, 070.54, 070.70, 070.71, B17.11, B18.2, B17.10, B19.20, B19.21, V02.62 |
| HBV | 070.20, 070.22, 070.30, 070.32, B16.0, 070.42, 070.52, 070.23, 070.33, 070.31, 070.21, B16.2, B19.11, B18.1, B16.9, B19.10, V02.61, B17.0, B18.0, B16.1 |
| ALD | 571.0, 571.1, 571.2, 571.3, K70.0, K70.10, K70.11, K70.2, K70.30, K70.31, K70.40, K70.41, K70.9 |
| NAFLD | K76.0, K75.81, 571.8, 571.9, 571.5 with obesity or diabetes |
| Other* | 571.42, 576.1, 5716, 273.4, 275.01, 275.02, 275.03, 275.1, K75.4, K83.01, K74.3, K74.5, K74.4, E88.01, E83.110, E83.111, E83.118, E83.119, E83.00, E83.01, E83.09 |

Abbreviation: HCV, hepatitis C virus; HBV, hepatitis B virus; ALD, alcohol-associated liver disease; NAFLD, non-alcoholic fatty liver disease

*Other liver diseases: autoimmune hepatitis, primary sclerosing cholangitis, primary biliary cholangitis, hemochromatosis, alpha-1 antitrypsin deficiency, and Wilson’s disease

**Supplemental Table 2**: Laboratory characteristics of HCC patients by liver disease etiology

| **Characteristic**  (mean±SD) | **Total**  N=20,662 | **HCV**  N=5,607 | **HBV**  N=589 | **ALD**  N=1,945 | **NAFLD**  N=8,168 | **Cryptogenic**  N=3,147 | **Other***  N=1,206 | ***P*-value** |
| --- | --- | --- | --- | --- | --- | --- | --- | --- |
| Platelet | 216±113 | 162±95 | 205±106 | 205±111 | 241±109 | 266±112 | 200±116 | <0.0001 |
| INR | 1.2±0.6 | 1.2±0.4 | 1.2±0.4 | 1.3±0.5 | 1.3±0.7 | 1.3±0.8 | 1.2±0.5 | <0.0001 |
| Creatinine | 1.1±0.6 | 1.1±0.7 | 1.1±0.7 | 1.1±0.6 | 1.1±0.7 | 1.0±0.5 | 1.0±0.6 | <0.0001 |
| AST | 55±84 | 76±124 | 52±54 | 55±64 | 45±63 | 46±57 | 58±58 | <0.0001 |
| ALT | 43±56 | 57±63 | 44±52 | 38±48 | 37±53 | 38±52 | 51±63 | <0.0001 |
| Alkaline phosphatase | 167±177 | 146±125 | 139±172 | 160±140 | 168±180 | 187±216 | 228±265 | <0.0001 |
| Total bilirubin | 1.0±1.2 | 1.2±1.2 | 1.0±1.1 | 1.2±1.3 | 0.8±1.0 | 0.8±1.0 | 1.5±1.8 | <0.0001 |
| Albumin | 3.8±0.6 | 3.7±0.6 | 4.0±0.6 | 3.7±0.6 | 3.9±0.5 | 4.0±0.6 | 3.6±0.6 | <0.0001 |
| AFP | 2,811±29,561 | 1,762±19,259 | 3,171±21,898 | 2,066±15,022 | 4,957±50,451 | 5,931±37,347 | 1,153±9,867 | 0.17 |
| ALBI  1  2  3 | 57.1  42.9  0 | 46.6  53.4  0 | 67.8  32.3  0 | 51.8  48.2  0 | 62.2  37.8  0 | 67.3  32.7  0 | 44.4  55.6  0 | <0.001 |

* Other liver diseases: autoimmune hepatitis, primary sclerosing cholangitis, primary biliary cholangitis, hemochromatosis, alpha-1 antitrypsin deficiency, and Wilson’s disease.

Abbreviations: HCC, hepatocellular carcinoma; HCV, hepatitis C virus; HBV, hepatitis B virus; ALD, alcohol-associated liver disease; NAFLD, non-alcoholic fatty liver disease; INR, international normalized ratio; AST, aspartate aminotransferase; ALT, alanine aminotransferase; AFP, alpha-fetoprotein; ALBI, albumin-bilirubin grade for HCC

**Supplemental Table 3:** Baseline characteristics of HCC cohort by viral vs. nonviral liver disease etiology

| **Characteristic** | **Viral** N=9,670  **27.9%** | **Nonviral*** N=25,036**72.1%** | ***P*-value** |
| --- | --- | --- | --- |
| Mean age (years±SD) | 64.3±9.5 | 69.9±12.0 | <0.0001 |
| Sex (%)  Male  Female | 74.5  25.5 | 56.3  43.7 | <0.001 |
| Race/ethnicity (%)  Caucasian  African American  Hispanic  Asian  Unknown | 52.5  15.6  15.0  9.1  7.8 | 65.8  10.1  13.2  2.9  7.9 | <0.001 |
| Cirrhosis (%) | 91.7 | 66.7 | <0.001 |
| Advance care directive (%) | 6.8 | 8.5 | <0.001 |
| Hospice/palliative care (%) | 29.7 | 37.3 | <0.001 |
| DCCI (±SD) | 7.3±4.3 | 9.7±3.9 | <0.0001 |
| Liver transplant (%) | 10.6 | 2.0 | <0.001 |
| Follow-up  (person-years) | 17,577 | 29,094 | – |

*Nonviral liver diseases: non-alcoholic fatty liver disease, alcohol-associated liver disease, autoimmune hepatitis, primary sclerosing cholangitis, primary biliary cholangitis, hemochromatosis, alpha-1 antitrypsin deficiency, and Wilson’s disease.

Abbreviation: DCCI: Deyo Charlson Comorbidity Index

**Supplemental Table 4:** Baseline characteristics in HCC subgroup by sex

| **Characteristic** | **Male**  N=21,298 | **Female**  N=13,397 | ***P*-value** |
| --- | --- | --- | --- |
| Mean age (years±SD) | 68.0±11.0 | 68.9±12.5 | <0.0001 |
| Race/ethnicity  Caucasian  African American  Hispanic  Asian  Unknown | 62.3  11.0  14.1  5.0  7.7 | 61.7  12.8  13.2  4.2  8.1 | <0.001 |
| Cirrhosis (%) | 77.8 | 67.1 | <0.001 |
| Advance care directive (%) | 7.5 | 8.8 | <0.001 |
| Hospice/palliative care (%) | 34.0 | 37.1 | <0.001 |
| DCCI (±SD) | 8.9±4.2 | 9.3±4.0 | <0.0001 |
| ALBI  1  2  3 | 53.8  46.2  0 | 62.2  37.8  0 | <0.001 |
| Antiviral treatment (%)  HCV DAA*  HBV | 29.4  43.7 | 30.6  32.9 | 0.13  0.003 |
| Liver transplant (%) | 5.3 | 2.9 | <0.001 |
| Follow-up  (person-years) | 27,949 | 18,707 | – |

*Includes only patients from 2014 and after

Abbreviation: HCC, hepatocellular carcinoma; DCCI, Deyo Charlson Comorbidity Index; HCV, hepatitis C virus; DAA, direct acting antiviral; HBV, hepatitis B virus; ALBI, albumin-bilirubin grade for HCC

**Supplemental Table 5:** Cox proportional hazards model for factors associated with HCC mortality - Alternative model with etiology as viral versus nonviral

| **Predictor** | **Univariable HR (95% CI)** | ***P*-value** | **Multivariable HR (95% CI)** | ***P*-value** |
| --- | --- | --- | --- | --- |
| Age | 1.03 (1.02-1.04) | <0.001 | 1.02 (1.01-1.03) | <0.001 |
| Male | 1.06 (1.03-1.09) | <0.001 | 1.11 (1.07-1.15) | <0.001 |
| Race/ethnicity  Asian  Caucasian  African American  Hispanic | Referent  1.69 (1.57-1.81)  1.73 (1.60-1.87)  1.54 (1.43-1.66) | <0.001  <0.001  <0.001 | Referent  1.47 (1.34-1.61)  1.52 (1.38-1.68)  1.28 (1.16-1.41) | <0.001  <0.001  <0.001 |
| Time period  2003-2013  2014-2021 | Referent  1.05 (1.02-1.08) | <0.001 | Referent  1.08 (1.04-1.13) | <0.001 |
| Etiology  Viral  Nonviral* | Referent  1.59 (1.54-1.64) | <0.001 | Referent  1.33 (1.27-1.40) | <0.001 |
| Baseline DCCI | 1.05 (1.04-1.06) | <0.001 | 1.04 (1.03-1.05) | <0.001 |
| Cirrhosis  No cirrhosis  Cirrhosis | Referent  1.10 (1.07-1.13) | <0.001 | Referent  1.21 (1.16-1.27) | <0.001 |
| ALBI grade  1  2 | Referent  1.55 (1.50-1.61) | <0.001 | Referent  1.57 (1.51-1.63) | <0.001 |
| HCC treatment  No transplant  Transplant | Referent  0.17 (0.15-0.19) | <0.001 | Referent  0.21 (0.18-0.25) | <0.001 |

* Nonviral liver diseases: non-alcoholic fatty liver disease, alcohol-associated liver disease, autoimmune hepatitis, primary sclerosing cholangitis, primary biliary cholangitis, hemochromatosis, alpha-1 antitrypsin deficiency, and Wilson’s disease

Abbreviation: HCC, hepatocellular carcinoma; ALBI, albumin-bilirubin grade for HCC

**Supplemental Figure 1:** Study flow chart


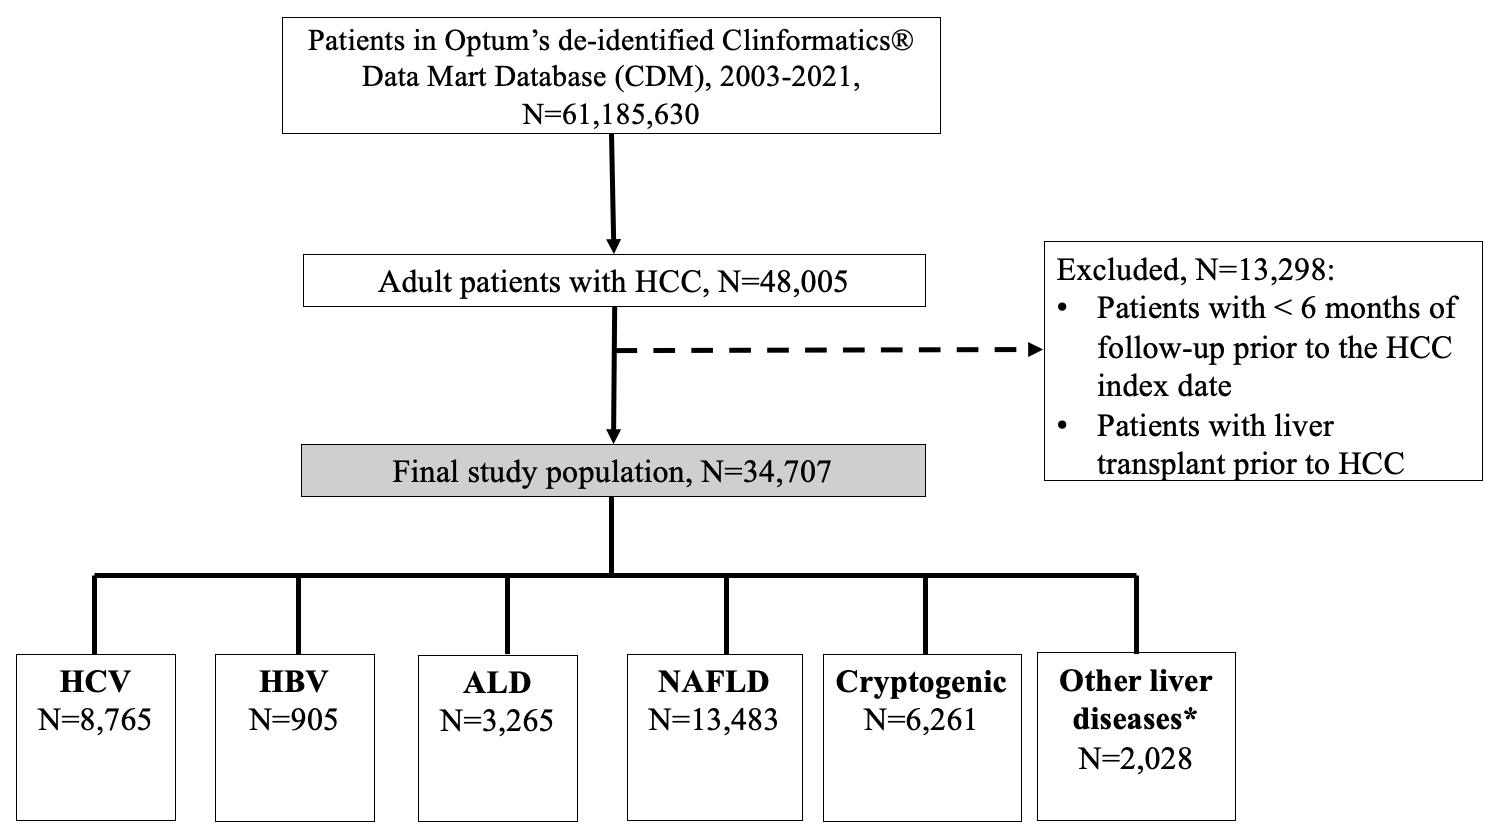


*Other liver diseases: autoimmune hepatitis, primary sclerosing cholangitis, primary biliary cholangitis, hemochromatosis, alpha-1 antitrypsin deficiency, and Wilson’s disease.

Abbreviation: HCC, hepatocellular carcinoma; HCV, hepatitis C virus; HBV, hepatitis B virus; ALD, alcohol-associated liver disease; NAFLD, non-alcoholic fatty liver disease

**Supplemental Figure 2:** Survival of HCC patients by sex


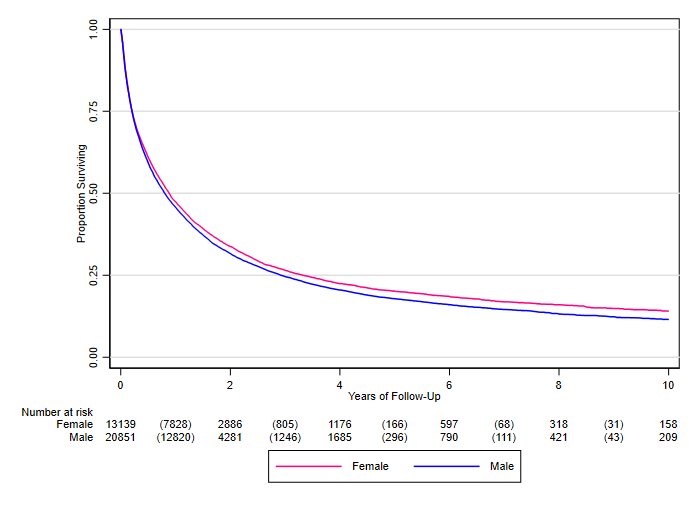


*P*<0.0001

| Survival (95% CI) | Median (years) | 5-year (%) |
| --- | --- | --- |
| Male | 0.80 (0.78-0.83) | 17.9 (17.2-18.6) |
| Female | 0.88 (0.85-0.92) | 20.2 (19.3-21.1) |

Abbreviation: HCC, hepatocellular carcinoma

**Supplemental Figure 3:** Survival of HCC patients by viral vs. nonviral etiology


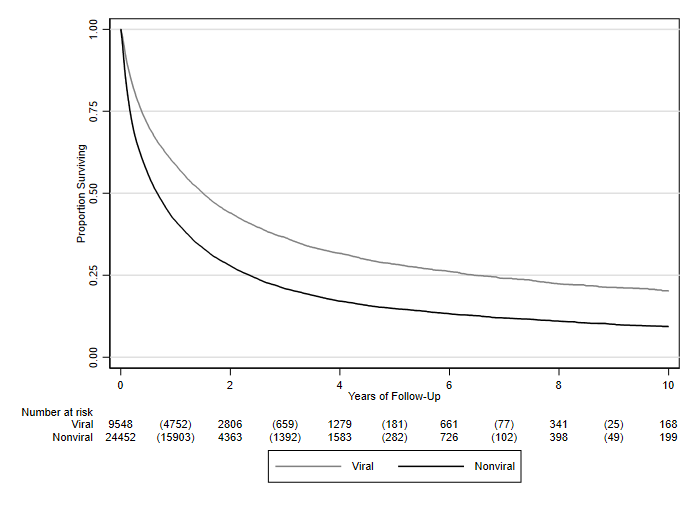


*P*<0.0001

| Survival (95% CI) | Median (years) | 5-year (%) |
| --- | --- | --- |
| Viral | 1.50 (1.44-1.58) | 28.4 (27.2-29.6) |
| Nonviral | 0.67 (0.65-0.69) | 14.9 (14.3-15.5) |

Abbreviation: HCC, hepatocellular carcinoma

**Supplemental Figure 4.** Survival in HCC patients by cirrhosis status in the total cohort


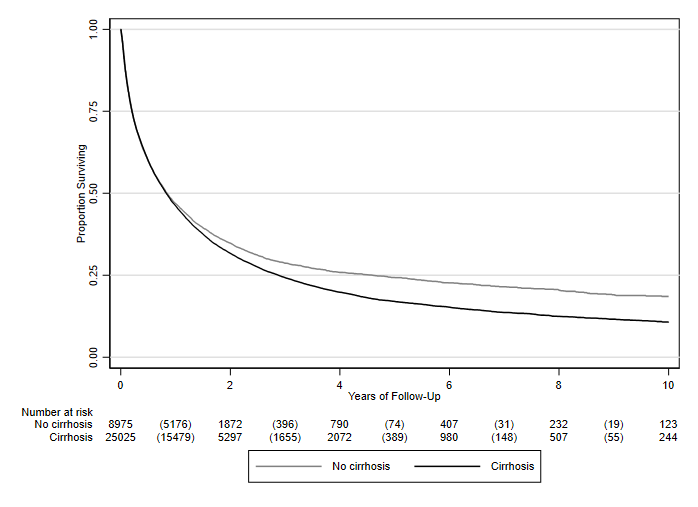


*P*<0.0001

| Survival (95% CI) | Median (years) | 5-year (%) |
| --- | --- | --- |
| No cirrhosis | 0.85 (0.80-0.89) | 24.3 (23.2-25.5) |
| Cirrhosis | 0.83 (0.81-0.86) | 17.0 (16.4-17.7) |

Abbreviation: HCC, hepatocellular carcinoma
